# Supplementary material for: Demand for Family Planning Satisfied With Modern Methods in Urban Malawi: CHAID Analysis to Identify Predictors and Women Underserved With Family Planning Services
Source: Research Square preprint supplement (doi:10.21203/rs.3.rs-111187/v1), 2020-11-24
Supplement: Supplementary file 1 [file 0c4ed5ac0bdb487120563150.docx]

**Table 3 Summary information on the specifications used to build the CHAID model**

| Model Components | Model specification | Results |
| --- | --- | --- |
| Dependent variable | Demand for FP satisfied with modern methods | % of women with demand satisfied=76.9 |
| Independent variables | Age, highest education, wealth quintile, religion, ethnicity, region, employment, marital status, exposure to FP information on radio, exposure to FP information on TV, exposure to FP information in newspapers/magazines, exposure to FP information by text messages on mobile phone, exposure to FP information in health facility, number of living children | *Number of living children*, ethnicity, region of residence, exposure to FP information on TV, exposure to FP information by text messages on mobile phone. |
| Maximum tree depth | 3 | 3 |
| Minimum cases in parent node | 100 | 100 |
| Minimum cases in child node | 50 | 50 |
| Number of nodes | - | 11 |
| Number of terminal nodes | - | 6 |
| Overall predicted correct percentage |  | 77.8 |

**Table 4 Summary information on the specifications used to build the CHAID model**

| Model Components | Model specification | Results |
| --- | --- | --- |
| Dependent variable | Demand for FP satisfied with modern methods | % of women with satisfied demand=78.1 |
| Independent variables | Age, highest education, wealth quintile, religion, ethnicity, region, employment, marital status, exposure to FP information on radio, exposure to FP information on TV, exposure to FP information in newspapers/magazines, exposure to FP information by text messages on mobile phone, exposure to FP information in health facility and number of living children, Age at marriage, Age difference between partners, husband education, husband employment, husband fertility preference | *Ethnicity*, husband education, wealth quintile, husband’s fertility preference, age, exposure to FP information by text messages on mobile phone, religion |
| Maximum tree depth | 3 | 3 |
| Minimum cases in parent node | 100 | 100 |
| Minimum cases in child node | 50 | 50 |
| Number of nodes | - | 16 |
| Number of terminal nodes | - | 9 |
| Overall predicted correct percentage |  | 79.1 |
